# Supplementary material for: Cultural and Contextual Drivers of Triple Burden of Malnutrition among Children in India
Source: MDPI journal article supplement (doi:10.3390/nu15153478), 2023-08-06
Supplement: s1 [file s1]

## **Supplementary Material**

### **Supplementary S1: Computation of composite indicator of Birth Weight and Birth Size**

Birth weight is a crucial anthropometric indicator used to assess nutrition among children, and it is recognized as one of the risk factors for stunting in children under 5 years of age [27,28]. However, missing data points in the birth weight variable can pose challenges for analysis. To address this issue, we developed a composite indicator that combines both birth weight and size data.

To compute the composite indicator, we first calculated individual indicators for 'birth weight' and 'size of child at birth'. We recoded the variable "m19" to create an indicator for birth weight:

- The indicator takes the value 1 for birth weight ranging from the minimum value to 2500 grams, indicating "Low Birth Weight."
- The indicator takes the value 2 for birth weight between 2501 and 9990 grams, indicating "Normal or Above."
- Any data points labeled as 'not weighed' or 'don't know' were recoded as missing.

Similarly, we computed the birth size indicator by recoding the available variable "m18" in the NFHS dataset:

- The indicator takes the value 1 if the size of the child at birth is reported as 'smaller than average' or 'very small.'
- The indicator takes the value 2 if the size at birth is reported as 'very large,' 'larger than average,' or 'average.'
- All other values, including 'don't know,' were recoded as missing.

To create the final composite indicator, we considered all non-missing values from the birth weight variable. However, since the birth weight variable contained approximately 30,000 missing cases, we took values from the birth size indicator in those instances to ensure comparability for all cases in further analyses.

By constructing this composite indicator, we aimed to address the issue of missing data and create a robust metric that incorporates both birth weight and size, providing a more comprehensive understanding of early childhood malnutrition in our study population. This approach enables us to overcome the limitations posed by missing data and offers valuable insights for further analysis and interpretation of our findings.

A.

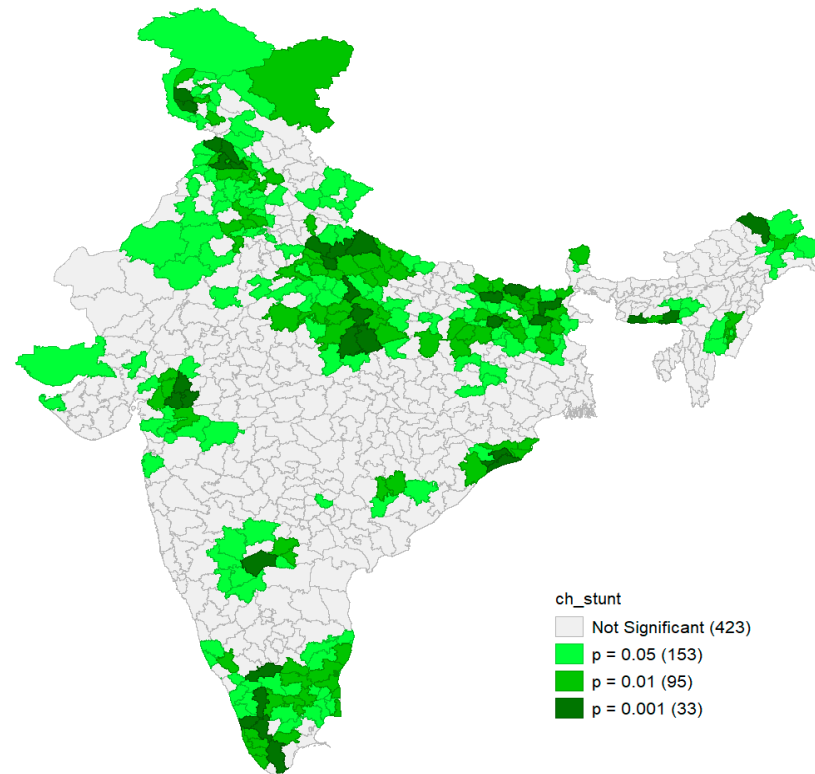

**B.**

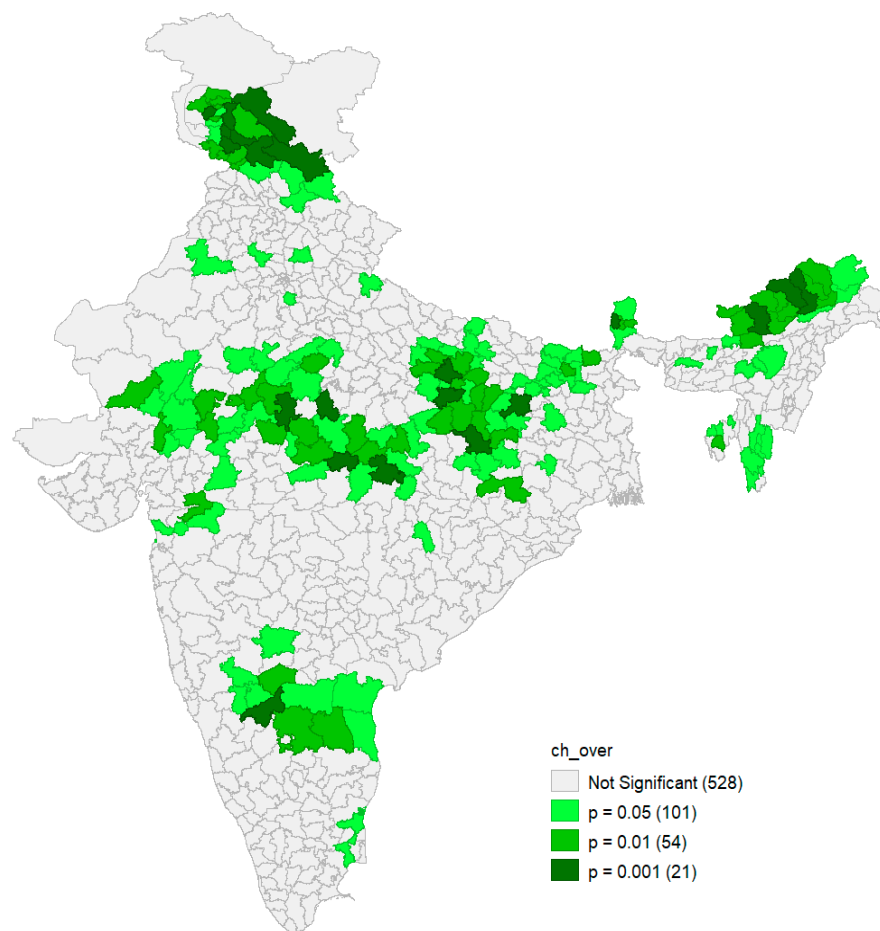

C.

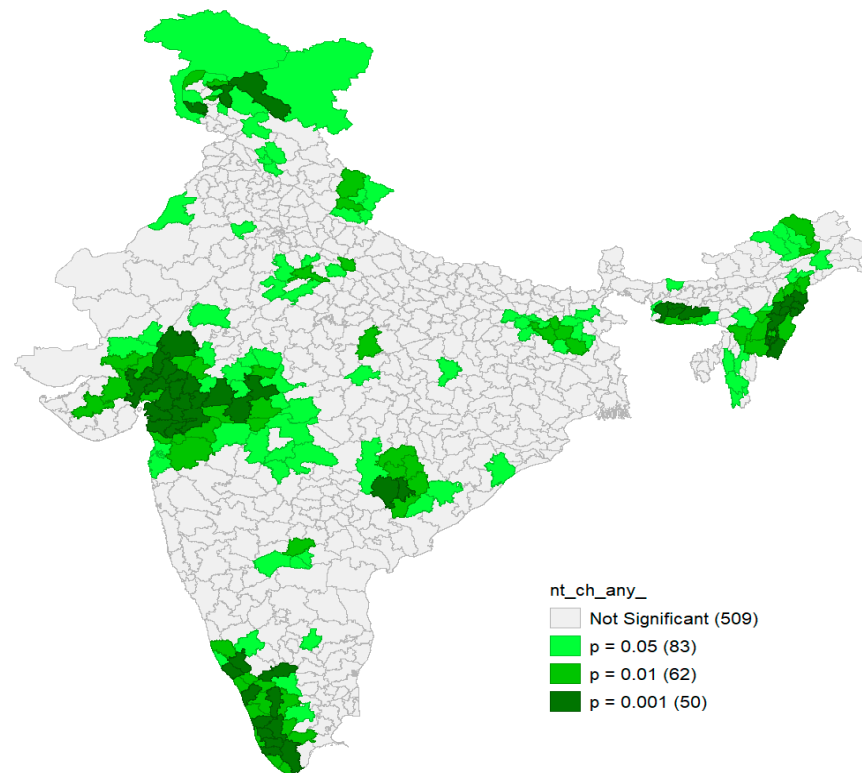

**Figure S1.** Univariate LISA significance map of (A) stunting (B) overweight and (C) anaemia among children aged 6-59 months across 707 districts in India, National Family Health Survey (NFHS-5), 2019-21.

**Table S1.** Ordinary Least Square and Spatial Auto Regressive (SAR) models for malnutrition outcomes (a) stunting (b) overweight and (c) anaemia among children aged 6-59 months across 707 districts, India, National Family Health Survey (NFHS-5), 2019–2021.

| Predictors                                      | Coefficient (p-value)       |                         |                           |
|-------------------------------------------------|-----------------------------|-------------------------|---------------------------|
|                                                 | Ordinary Least Square (OLS) | Spatial Lag Model (SLM) | Spatial Error Model (SEM) |
| <b>(a) Stunting</b>                             |                             |                         |                           |
| Rural                                           | -0.029 (0.029)              | -0.019 (0.145)          | -0.026 (0.059)            |
| Poorest                                         | 0.046 (0.063)               | 0.037 (0.118)           | 0.066 (0.058)             |
| Scheduled Castes/Tribes                         | -0.013 (0.379)              | 0.002 (0.914)           | 0.001 (0.951)             |
| Ten or more years of Schooling                  | 0.013 (0.527)               | 0.018 (0.313)           | 0.005 (0.827)             |
| Exposure to Mass Media                          | 0.004 (0.893)               | 0.020 (0.463)           | 0.024 (0.432)             |
| Muslim                                          | 0.009 (0.521)               | 0.025 (0.084)           | 0.015 (0.390)             |
| Female Child                                    | 0.171 (0.011)               | 0.142 (0.023)           | 0.132 (0.032)             |
| Three or more Birth Order                       | 0.364 (0.000)               | 0.290 (0.000)           | 0.327 (0.000)             |
| Children under 6 months exclusively breastfed   | 0.009 (0.333)               | 0.008 (0.362)           | 0.009 (0.253)             |
| Children 6-23 months receiving an adequate diet | -0.028 (0.443)              | -0.010 (0.767)          | -0.044 (0.238)            |
| Women with Body Mass Index<18.5 kg/m2           | 0.353 (0.000)               | 0.277 (0.000)           | 0.310 (0.000)             |
| Household with Improved Sanitation              | -0.061 (0.004)              | -0.052 (0.009)          | -0.064 (0.008)            |
| Constant                                        | 15.90 (0.000)               | 6.01 (0.122)            | 17.38 (0.000)             |
| Number of Observations                          | 707                         | 707                     | 707                       |
| Log likelihood                                  | -2299.98                    | -2267.47                | -2267.66                  |
| AIC                                             | 4625.97                     | 4562.95                 | 4561.32                   |
| Adjusted R square                               | 0.53                        | 0.595                   | 0.597                     |
| Lag (Rho) Coefficient                           |                             | 0.317                   |                           |
| Error (Lambda) Coefficient                      |                             |                         | 0.406                     |
| <b>(b) Overweight</b>                           |                             |                         |                           |
| Urban                                           | 0.004 (0.597)               | 0.007 (0.227)           | 0.005 (0.022)             |
| Richest                                         | -0.018 (0.057)              | -0.012 (0.162)          | -0.011 (0.379)            |
| Scheduled Castes/Tribes                         | 0.035 (0.000)               | 0.023 (0.000)           | 0.026 (0.000)             |
| Ten or more years of Schooling                  | 0.002 (0.805)               | 0.005 (0.589)           | 0.0097 (0.414)            |
| Exposure to Mass Media                          | -0.015 (0.141)              | -0.014 (0.135)          | -0.019 (0.104)            |
| Muslim                                          | 0.031 (0.000)               | 0.019 (0.003)           | 0.029 (0.001)             |
| Female Child                                    | 0.072 (0.011)               | 0.059 (0.026)           | 0.049 (0.057)             |
| Three or more Birth Order                       | -0.049 (0.000)              | -0.028 (0.034)          | -0.021 (0.218)            |
| Children under 6 months exclusively breastfed   | 0.003 (0.371)               | 0.004 (0.322)           | 0.003 (0.460)             |
| Children 6-23 months receiving an adequate diet | -0.009 (0.572)              | -0.009 (0.507)          | 0.000 (0.999)             |
| Women with Body Mass Index<18.5 kg/m2           | -0.149 (0.000)              | -0.103 (0.000)          | -0.127 (0.000)            |
| Births delivered by Caesarean Section           | 0.011 (0.304)               | 0.008 (0.369)           | 0.022 (0.079)             |
| Constant                                        | 3.55 (0.027)                | 1.58 (0.284)            | 3.41 (0.022)              |
| Number of Observations                          | 707                         | 707                     | 707                       |
| Log likelihood                                  | -1724.98                    | -1682.25                | -1685                     |

|                    |                                                 |                |                |                |
|--------------------|-------------------------------------------------|----------------|----------------|----------------|
|                    | AIC                                             | 3475.96        | 3392.5         | 3396.01        |
|                    | Adjusted R square                               | 0.26           | 0.378          | 0.38           |
|                    | Lag (Rho) Coefficient                           |                | 0.41           |                |
|                    | Error (Lambda) Coefficient                      |                |                | 0.46           |
| <b>(c) Anaemia</b> |                                                 |                |                |                |
|                    | Rural                                           | -0.018 (0.287) | -0.007 (0.674) | -0.013 (0.484) |
|                    | Poorest                                         | -0.271 (0.000) | 0.174 (0.000)  | -0.109 (0.005) |
|                    | Scheduled Castes/Tribes                         | 0.034 (0.106)  | 0.023 (0.162)  | 0.001 (0.951)  |
|                    | Ten or more years of Schooling                  | -0.124 (0.000) | -0.060 (0.011) | -0.068 (0.057) |
|                    | Exposure to Mass Media                          | -0.060 (0.116) | -0.017 (0.618) | 0.021 (0.605)  |
|                    | Muslim                                          | 0.035 (0.084)  | 0.038 (0.036)  | 0.046 (0.069)  |
|                    | Female Child                                    | 0.248 (0.005)  | 0.282 (0.000)  | 0.199 (0.011)  |
|                    | Three or more Birth Order                       | 0.000 (0.991)  | 0.031 (0.400)  | 0.064 (0.191)  |
|                    | Children under 6 months exclusively breastfed   | 0.033 (0.004)  | 0.028 (0.006)  | 0.023 (0.024)  |
|                    | Children 6-23 months receiving an adequate diet | -0.215 (0.000) | -0.135 (0.002) | -0.059 (0.219) |
|                    | Women with Body Mass Index<18.5 kg/m2           | 0.195 (0.000)  | 0.084 (0.0611) | 0.060 (0.291)  |
|                    | Household with Improved Sanitation              | 0.110 (0.000)  | 0.083 (0.001)  | -0.085 (0.009) |
|                    | Anaemic Mothers                                 | 0.566 (0.000)  | 0.465 (0.000)  | 0.583 (0.000)  |
|                    | Constant                                        | 43.69 (0.000)  | 13.51 (0.012)  | 30.22 (0.000)  |
|                    | Number of Observations                          | 707            | 707            | 707            |
|                    | Log likelihood                                  | -2491.62       | -2438.06       | -2449.29       |
|                    | AIC                                             | 5011.25        | 4906.12        | 4926.59        |
|                    | Adjusted R square                               | 0.57           | 0.64           | 0.64           |
|                    | Lag (Rho) Coefficient                           |                | 0.36           |                |
|                    | Error (Lambda) Coefficient                      |                |                | 0.55           |

**Table S2.** Result of quantile regression with proportion of children who were stunted, underweight and anaemia by some selected characteristics in 707 districts of India, NFHS-5 (2019–2021). \*\*\*  $p < 0.001$ , \*\*  $p < 0.05$ , \*  $p < 0.1$ .

| Childhood Stunting                              | q25        | q50       | q75       | q90       |
|-------------------------------------------------|------------|-----------|-----------|-----------|
| Rural                                           | -0.0437*** | -0.0213   | -0.0222   | -0.00588  |
| Poorest                                         | -0.000407  | -0.00157  | 0.0377    | 0.0205    |
| Scheduled Castes/Tribes                         | 0.0154     | 0.0128    | -0.0086   | -0.0169   |
| Ten or more years of Schooling                  | 0.029      | -0.0109   | -0.017    | -0.0224   |
| Exposure to Mass Media                          | -0.0805    | -0.0375   | -0.0111   | 0.0117    |
| Muslim                                          | 0.0206     | 0.0274    | 0.0165    | 0.0213    |
| Female Child                                    | -0.0206    | 0.0977    | 0.0909    | 0.0947    |
| Three or more Birth Order                       | 0.252***   | 0.295***  | 0.372***  | 0.389***  |
| Children under 6 months exclusively breastfed   | 0.0153     | 0.0105    | 0.0148    | -0.0129   |
| Children 6-23 months receiving an adequate diet | -0.0947    | -0.0278   | -0.0157   | -0.0312   |
| Women with Body Mass Index<18.5 kg/m2           | 0.305***   | 0.390***  | 0.342***  | 0.310***  |
| Household with Improved Sanitation              | -0.122***  | -0.0708** | -0.0422   | -0.0491   |
| Constant                                        | 36.28***   | 24.40**   | 23.91***  | 27.30***  |
| Childhood Overweight                            | q25        | q50       | q75       | q90       |
| Urban                                           | 0.00565    | 0.00683   | 0.0137    | 0.00905   |
| Richest                                         | -0.0132    | -0.0194** | -0.0341** | -0.0506*  |
| Scheduled Castes/Tribes                         | 0.00878    | 0.0261*** | 0.0513*** | 0.0514*** |
| Ten or more years of Schooling                  | -0.00245   | 0.0196*   | 0.0299*   | 0.000993  |
| Exposure to Mass Media                          | -0.00213   | -0.0116   | -0.0136   | 0.000273  |
| Muslim                                          | 0.0101     | 0.0281*   | 0.0411*** | 0.0247*   |
| Female Child                                    | 0.0173     | 0.0487    | 0.0990*   | 0.155*    |
| Three or more Birth Order                       | -0.00903   | -0.0236   | -0.0635*  | -0.102**  |
| Children under 6 months exclusively Breastfed   | -0.00264   | -0.000952 | -0.000321 | 0.00437   |
| Children 6-23 months receiving an adequate diet | 0.0238     | 0.00363   | 0.0195    | 0.0038    |
| Women with Body Mass Index<18.5 kg/m2           | -0.0870*** | -0.123*** | -0.192*** | -0.266*** |
| Births delivered by Caesarean Section           | 0.0161     | 0.0125    | -0.00922  | -0.0107   |
| Constant                                        | 0.328      | -0.459    | -1.687    | 0.506     |
| Childhood Anaemia                               | q25        | q50       | q75       | q90       |
| Rural                                           | -0.0118    | -0.0563   | -0.0509*  | -0.0225   |
| Poorest                                         | -0.351***  | -0.260*** | -0.233*** | -0.259*** |
| Scheduled Castes/Tribes                         | 0.0184     | 0.0278    | 0.0488    | 0.0702**  |
| Ten or more years of Schooling                  | -0.195***  | -0.146*** | -0.181*** | -0.174*** |
| Exposure to Mass Media                          | -0.140*    | -0.0896   | -0.0756   | -0.064    |
| Muslim                                          | 0.029      | 0.0231    | 0.0144    | 0.0249    |
| Female Child                                    | -0.0029    | 0.148     | 0.0804    | -0.0445   |
| Three or more Birth Order                       | -0.114     | -0.0930*  | -0.147**  | -0.122*   |

|                                                 |           |           |           |           |
|-------------------------------------------------|-----------|-----------|-----------|-----------|
| Children under 6 months exclusively Breastfed   | 0.0451**  | 0.0392**  | 0.0286    | 0.0258    |
| Children 6-23 months receiving an adequate diet | -0.191*   | -0.164**  | -0.257*** | -0.221*** |
| Women with Body Mass Index<18.5 kg/m2           | 0.217**   | 0.109     | 0.0646    | 0.0638    |
| Household with Improved Sanitation              | -0.155*** | -0.175*** | -0.152*** | -0.145*** |
| Anaemic Mothers                                 | 0.485***  | 0.528***  | 0.472***  | 0.469***  |
| Constant                                        | 71.29***  | 65.26***  | 77.62***  | 82.85***  |
